# Supplementary material for: Oxidative stress activates red cell adhesion to laminin in sickle cell disease
Source: PubMed Central journal article supplement — Haematologica. 2020 Aug 27;106(9):2478–88. doi: 10.3324/haematol.2020.261586 (PMC8409043; doi:10.3324/haematol.2020.261586), 2020-08-27
Supplement: 2020_261586_LIZARRALDE_SUPPL.pdf [file 2020_261586_LIZARRALDE_SUPPL.pdf]

## Oxidative stress activates red cell adhesion to laminin in sickle cell disease

Maria Alejandra Lizarralde-Iragorri,<sup>1,2,3\*</sup> Sophie D. Lefevre,<sup>1,2,3\*</sup> Sylvie Cochet,<sup>1,2,3</sup> Sara El Hoss,<sup>1,2,3</sup> Valentine Brousse,<sup>1,2,3,4</sup> Anne Filipe,<sup>1,2,3,5</sup> Michael Dussiot,<sup>6</sup> Slim Azouzi,<sup>1,2,3</sup> Caroline Le Van Kim,<sup>1,2,3</sup> Fernando Rodrigues-Lima,<sup>5</sup> Olivier François,<sup>7</sup> Bruno Le Pioufle,<sup>8</sup> Thomas Klei,<sup>9</sup> Robin van Bruggen<sup>9</sup> and Wassim El Nemer<sup>1,2,3</sup>

\*MALI and SDL contributed equally as co-first authors.

<sup>1</sup>Université de Paris, UMR S1134, BIGR, INSERM, Paris, France; <sup>2</sup>Institut National de la Transfusion Sanguine, Paris, France; <sup>3</sup>Laboratoire d'Excellence GR-Ex, Paris, France; <sup>4</sup>Service de Pédiatrie Générale et Maladies Infectieuses, Hôpital Universitaire Necker Enfants Malades, Paris, France; <sup>5</sup>Université de Paris, BFA, UMR 8251, CNRS, Paris, France; <sup>6</sup>Institut Imagine, INSERM U1163, CNRS UMR8254, Université Paris Descartes, Hôpital Necker Enfants Malades, Paris, France; <sup>7</sup>ESYCOM, Université Gustave Eiffel, CNRS UMR 9007, ESIEE Paris, Marne-la-Vallée, France; <sup>8</sup>Université Paris-Saclay, ENS Paris-Saclay, CNRS Institut d'Alembert, LUMIN, Gif sur Yvette, France and <sup>9</sup>Department of Blood Cell Research, Sanquin Research and Lab Services and Landsteiner Laboratory, Academic Medical Center, University of Amsterdam, Amsterdam, the Netherlands

©2021 Ferrata Storti Foundation. This is an open-access paper. doi:10.3324/haematol.2020.261586

Received: June 2, 2020.

Accepted: August 12, 2020.

Pre-published: August 27, 2020.

Correspondence: *WASSIM EL NEMER* - wassim.el-nemer@efs.sante.fr

---

## Supplemental Figure S1

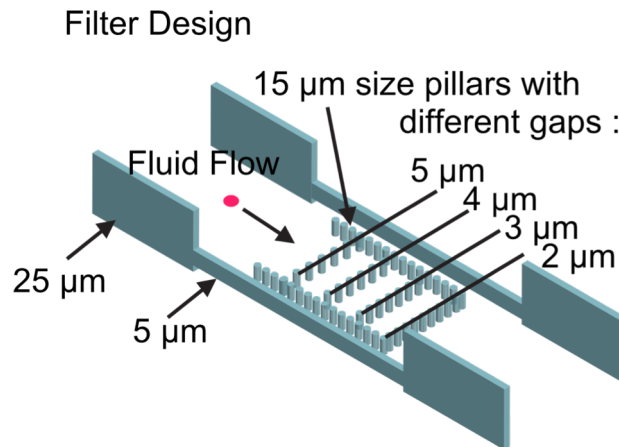

**Supplemental Figure S1. Microfluidic biomimetic chip.** One of the 8 filtering units of the microfluidic device. The filtering unit is 5  $\mu\text{m}$ -high and has a U shape composed of a series of 15  $\mu\text{m}$  pillars separated by 2  $\mu\text{m}$  slits, with two 10  $\mu\text{m}$ -wide side channels. Inside the U shape, 4 rows are disposed in parallel with decreasing slit width (5, 4, 3 and 2  $\mu\text{m}$ ).

## Supplemental Figure S2

**A**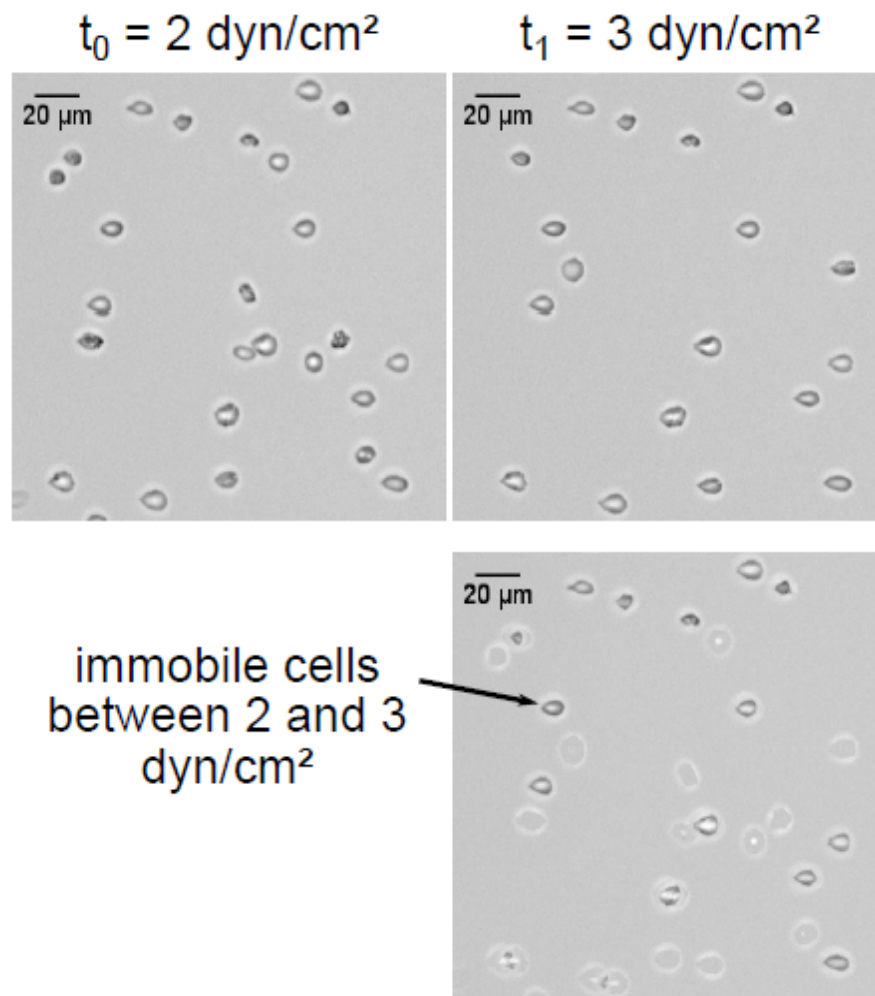**B**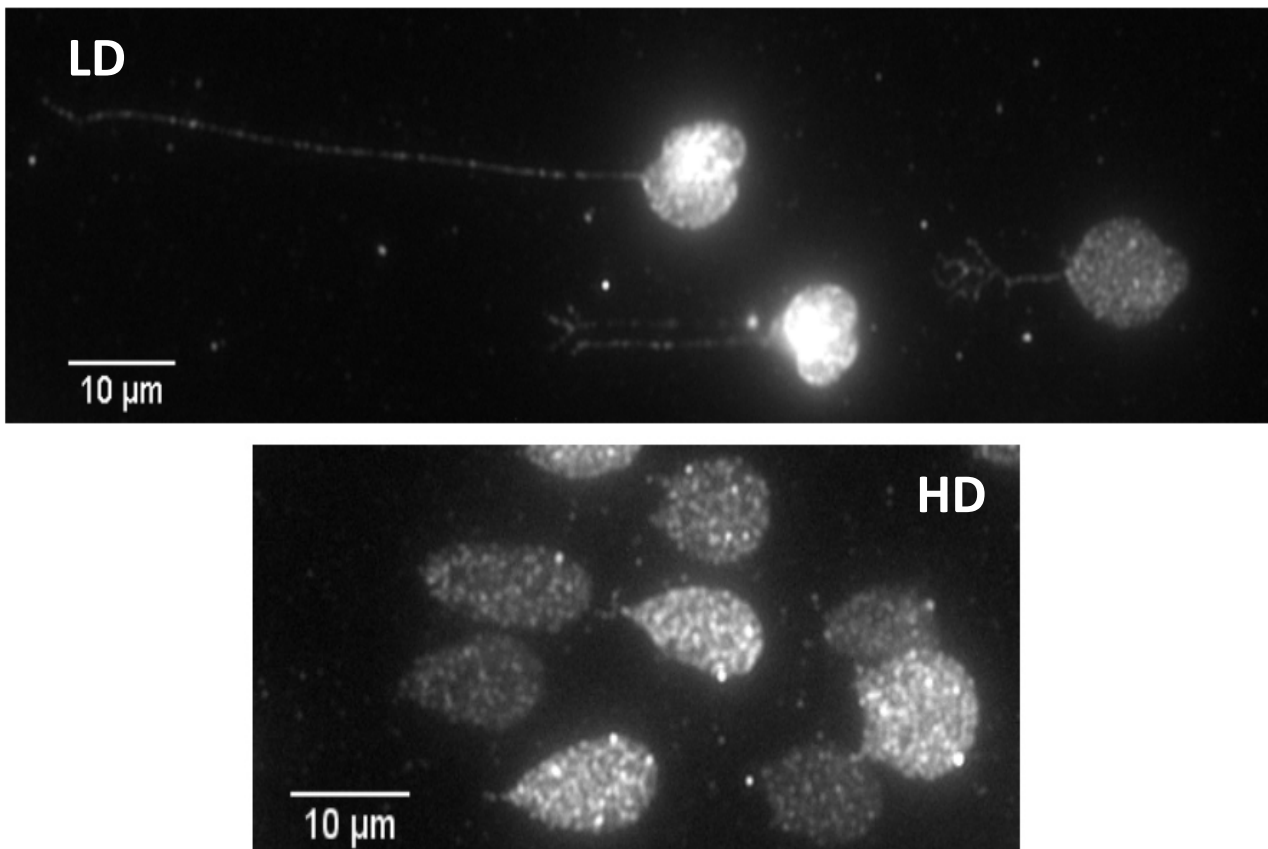

Supplemental Figure S2. Enlarged images from (A) Figure 2C and (B) Figure 2E.

### Supplemental Figure S3

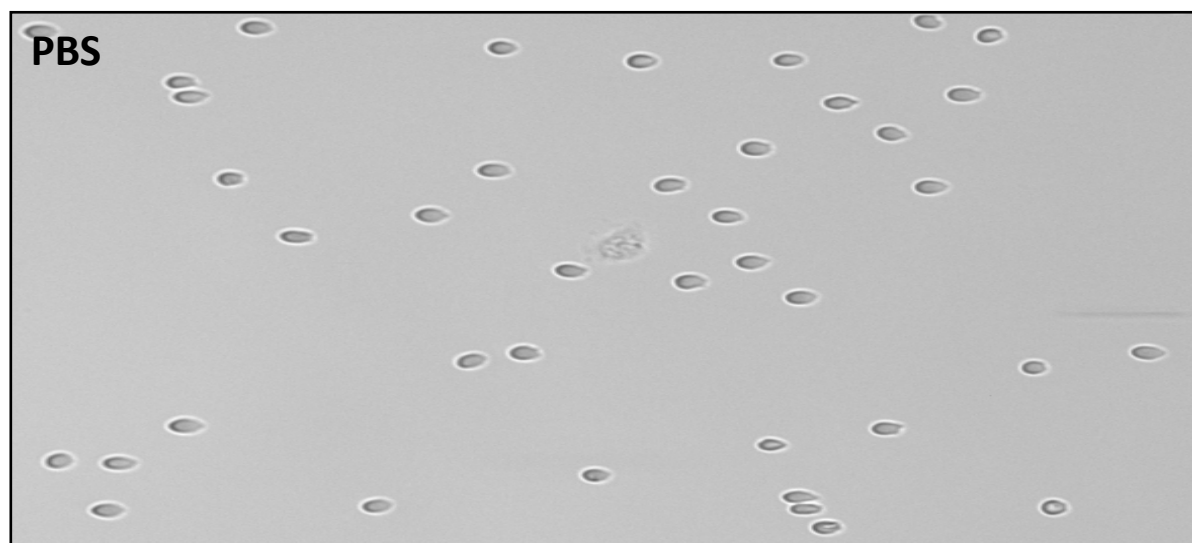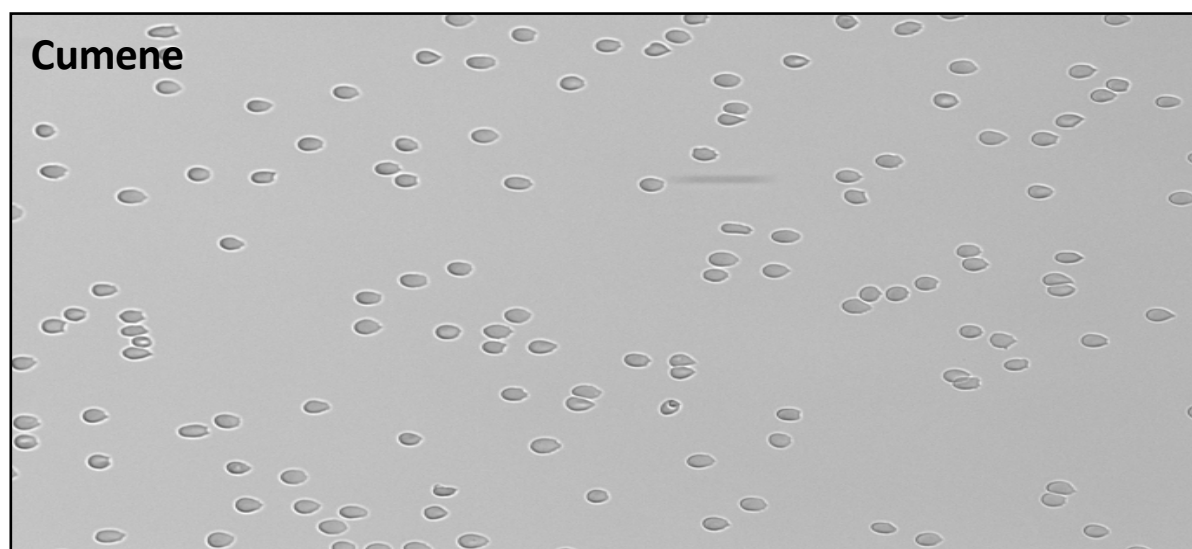

**Supplemental Figure S3.** Enlarged images from Figure 3A.

Supplemental Figure S4

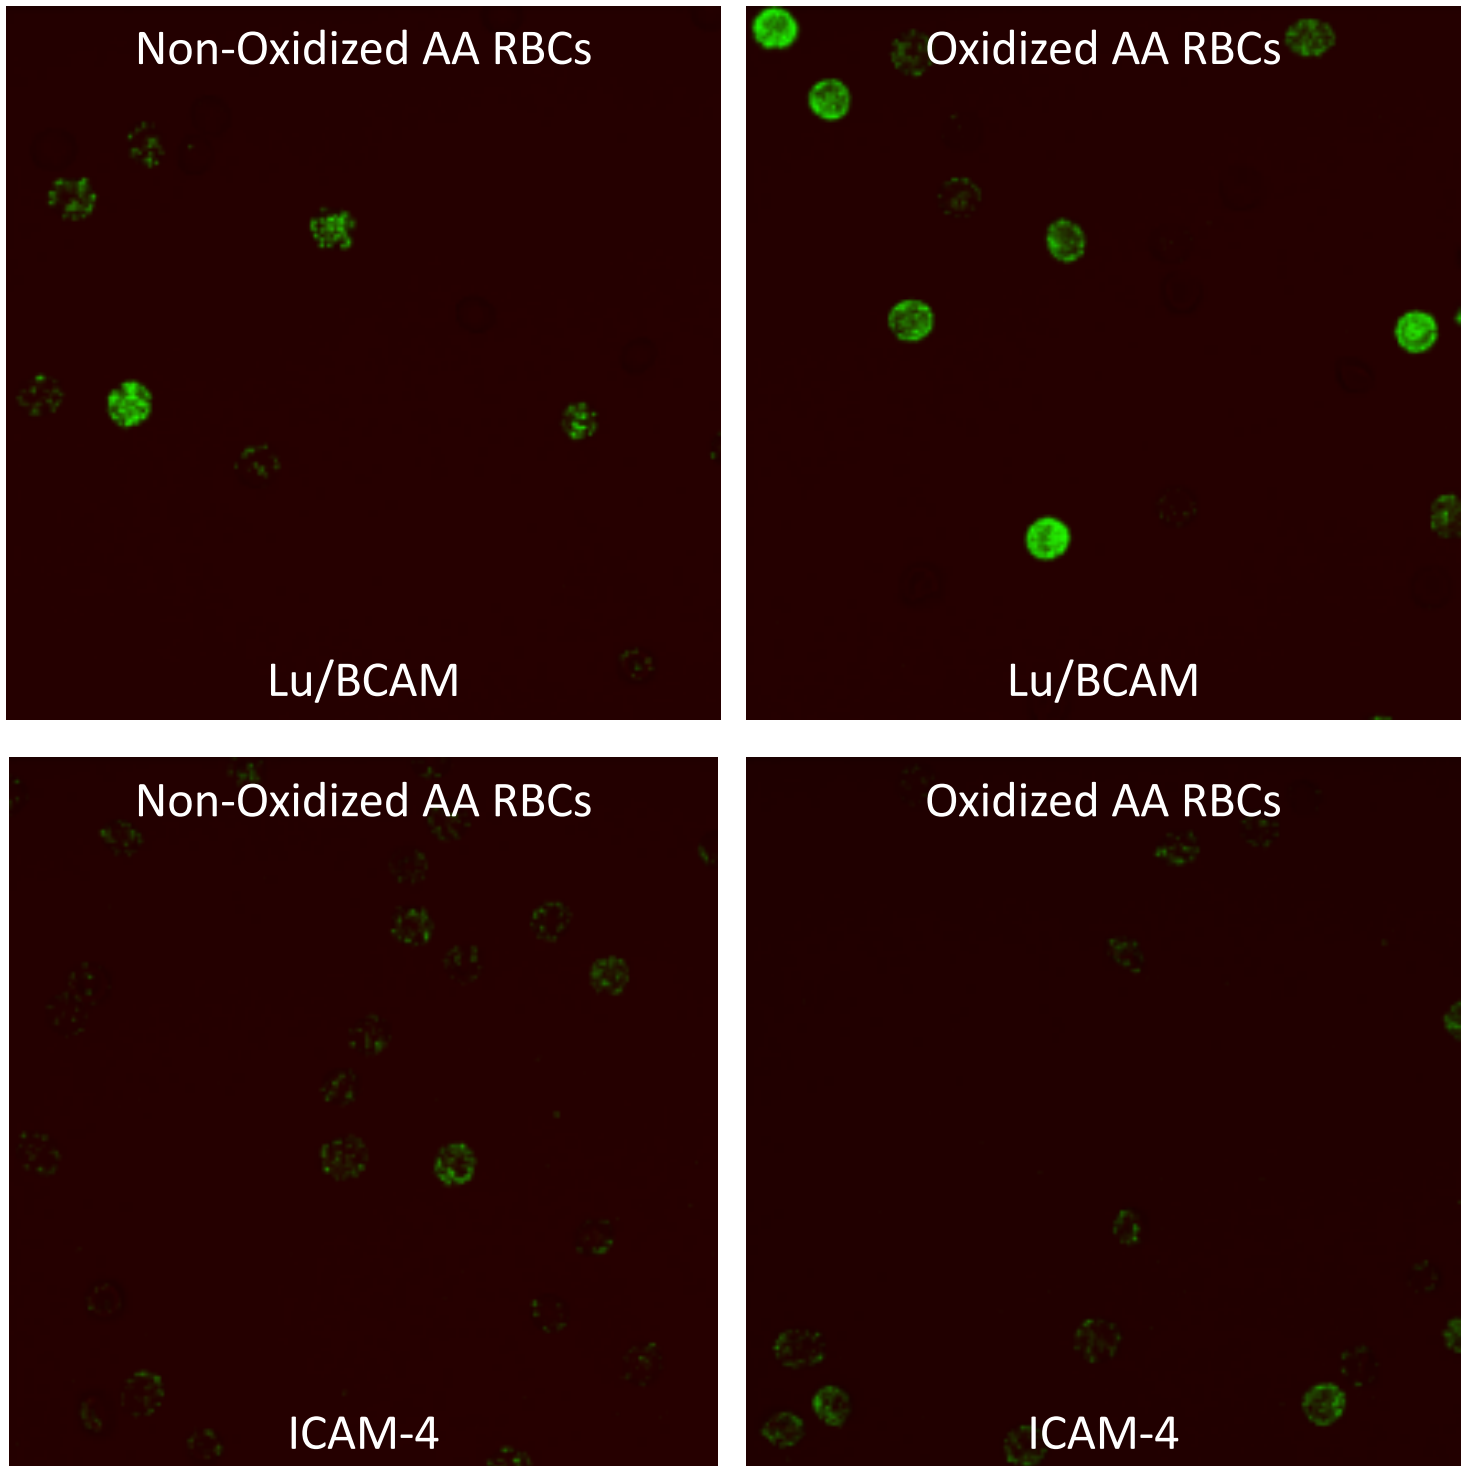

Supplemental Figure S4. Enlarged images from Figure 4A.

## Supplemental Figure S5

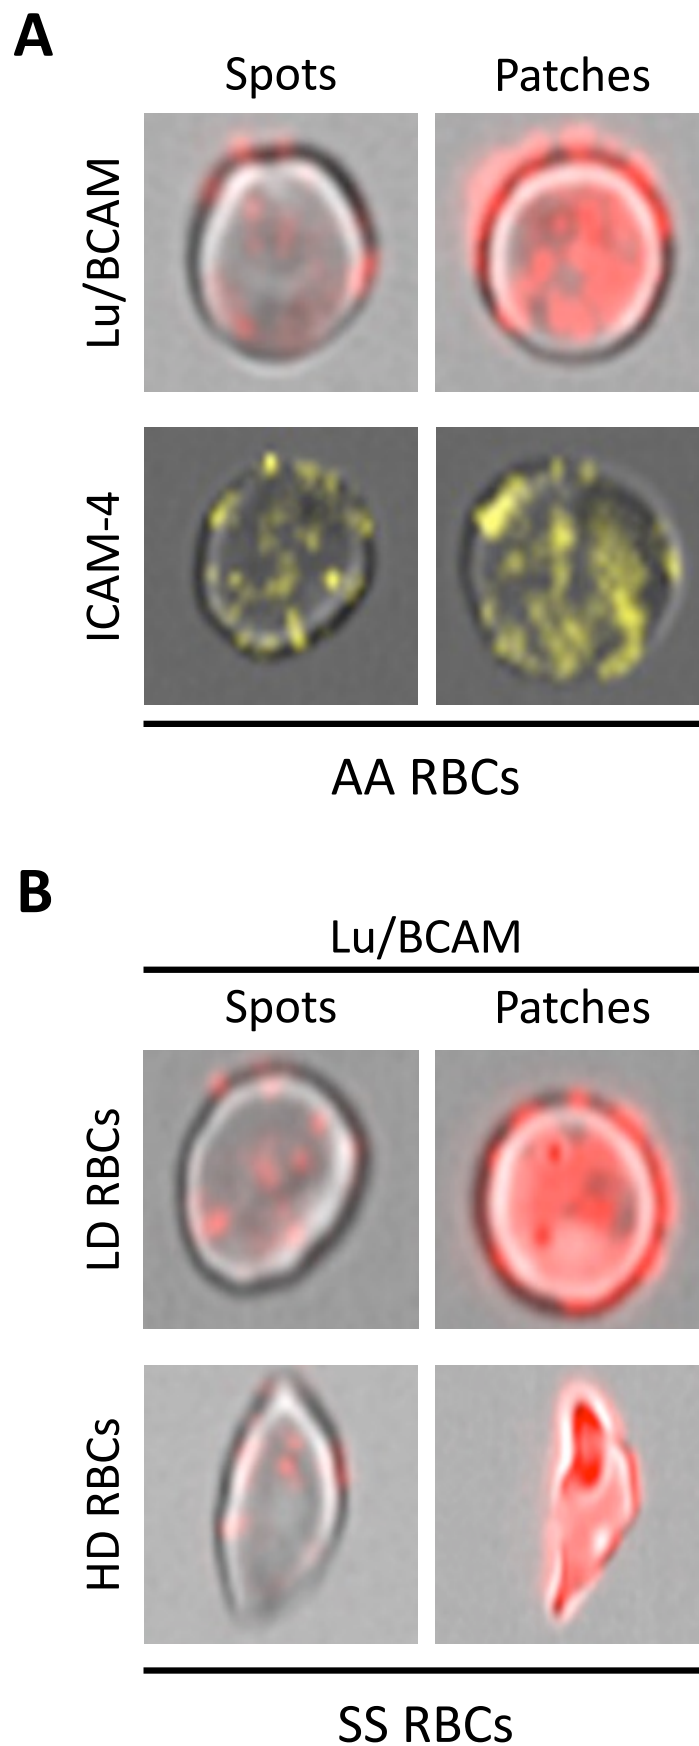

**Supplemental Figure S5.** Enlarged images from Figure 4 showing typical Lu/BCAM and ICAM-4 staining on (A) AA and (B) SS RBCs.

## **Video legend**

**Video 1:** Adhesion to laminin 521 of sickle red blood cells (RBCs) from the low density (LD, top panel) and high density (HD, bottom panel) fractions (shear stress: 3 dyn/cm<sup>2</sup>). HD RBCs adhere firmly to laminin while LD RBCs show a dual cellular behavior, with firm adhesion and rolling. The rolling LD RBCs are most probably young reticulocytes, as reflected by their round, multilobar morphology.
